# Supplementary material
Source: HighWire-hosted journal article supplement (https://www.jrheum.org/highwire/filestream/41044/field_highwire_adjunct_files/0/210363DataSuppl.pdf)
Supplement: 210363DataSuppl.pdf [file 210363DataSuppl.pdf]

## SUPPLEMENTARY METHODS

### Genotyping, imputation, and ancestry inference

Participants were genotyped using the Multi-Ethnic Global Array (MEGA), which includes approximately 2 million SNPs or the Global Screening Array (GSA), which includes 654,027 SNPs.(1,2) Genotyping was conducted following protocols specified by The Centre for Applied Genomics (TCAG) at SickKids. Quality control (QC) measures included comparing genotype inferred sex chromosome composition (X chromosome heterozygosity and Y chromosome call rate) with self-reported sex, sample call rates >90%, autosomal heterozygosity to detect potential sample contamination, SNP call rate >97%, and a Hardy-Weinberg equilibrium threshold of  $1 \times 10^{-6}$ . SNPs not genotyped were imputed using the Sanger Imputation Server and the Haplotype Reference Consortium (HRC) and 1000 Genomes Project (1KGP) phase 3 as references.(3) HLA allele dosages in inferred European participants only were imputed using SNP2HLA and Type 1 Diabetes Genetics Consortium as a reference.(4,5)

Ancestry was inferred for each participant using 1KGP and the Human Genome Diversity Project (HGDP) as referents.(3,6) Individuals were inferred to be of a specific ancestry if their first three principal components (PCs) were within the range (mean  $\pm$  standard deviation) of the first 3 PCs of the referent group with the corresponding ethnicity. If there were discordances between 1KGP or HGDP, the software tool ADMIXTURE was used to estimate relative proportions of ancestral groups within discordant subjects.(7) Participants with single ancestral proportions  $\geq 80\%$  were classified into one of five ancestral groups: African, Amerindian, East Asian, European, or South Asian. Participants displaying ancestral proportions <80% were classified as “Admixed”. Due to sample size restrictions, for our analyses, participants in the Amerindian ancestral group were combined with the “Admixed” group.

## Polygenic risk score (PRS) calculations

We selected SNPs for inclusion in schizophrenia PRSs based on the most recent, comprehensive schizophrenia GWAS conducted to-date by the Schizophrenia Working Group of the Psychiatric Genomics Consortium (SWG-PGC).(8) The study of up to 36,989 cases with schizophrenia and 113,075 controls identified 128 independent genome-wide significant SNPs ( $P < 5 \times 10^{-8}$ ) and over 100,000 SNPs showing modest association with schizophrenia.(8) We computed two PRSs using: 1) genome-wide significant SNPs ( $P < 5 \times 10^{-8}$ ) and 2) an expanded list of SNPs significant at a threshold of  $P < 0.05$ . The SWG-PGC paper also calculated PRSs for schizophrenia and we used their QC procedures as guiding principles in creating our PRSs.(8) We excluded the following SNPs from our calculations: insertions/deletions, sex chromosomes, uncommon SNPs (minor allele frequency [MAF]  $< 10\%$ ) and low-quality variants (imputation INFO  $< 0.9$ ) on either array, SNPs in the extended major histocompatibility complex (MHC) region (chr6:25-34 Mb) and variants within 500 kb of and with evidence for linkage disequilibrium (LD,  $r^2 \geq 0.1$ ) with another more significant marker. For the expanded PRS only, we removed all ambiguous SNPs (i.e., those with complementary alleles such as A/T or C/G) for which we were unable to use allele frequencies to infer which alleles matched. All SNPs retained in the analyses were independent of each other, allowing their effects to be summed.(8,9) After exclusions, a total 76/128 SNPs were included in the GWAS PRS calculations and a total 15,305/24,850 SNPs were included in the extended PRS calculations for schizophrenia.

We calculated additive, allelic schizophrenia PRSs, for each participant by identifying the risk alleles, weighting the allele dosages by the log odds ratios (log(ORs)) from the SWG-PGC study, and summing up the values to derive the PRS.(8,9)

## SUPPLEMENTARY TABLES

**Supplementary Table 1. Association between NPSLE, NPSLE subtypes and schizophrenia expanded PRS\***

| Variable                                              | OR (95% CI) p-value    |      |                        |      |                                  |      |
|-------------------------------------------------------|------------------------|------|------------------------|------|----------------------------------|------|
|                                                       | Any NPSLE <sup>†</sup> |      | Psychosis <sup>‡</sup> |      | Non-psychosis NPSLE <sup>‡</sup> |      |
| Unadjusted expanded PRS                               | 1.19 (1.00 - 1.43)     | 0.06 | 0.97 (0.74 - 1.29)     | 0.86 | 1.30 (1.06 - 1.59)               | 0.01 |
| Ancestry adjusted expanded PRS                        | 1.08 (0.89 - 1.32)     | 0.43 | 0.92 (0.68 - 1.24)     | 0.57 | 1.16 (0.93 - 1.45)               | 0.18 |
| Full multivariable adjusted expanded PRS <sup>§</sup> | 1.07 (0.87 - 1.31)     | 0.53 | 0.91 (0.67 - 1.24)     | 0.55 | 1.15 (0.91 - 1.44)               | 0.24 |

\* Reference category is absence of any NPSLE feature.

<sup>†</sup> Binomial logistic regression model

<sup>‡</sup> Multinomial logistic regression model

<sup>§</sup> Model adjusted for inferred ancestry categories (Admixed, African, East Asian, South Asian), malar rash, oral or nasal ulcers, arthritis, lymphopenia, Coombs-positive hemolytic anemia, and lupus anticoagulant and/or anticardiolipin antibodies.

Abbreviations: CI: confidence interval; GWAS: genome-wide association studies; NPSLE: neuropsychiatric systemic lupus erythematosus; OR: odds ratio; PRS: polygenic risk scores

**Supplementary Table 2. Single schizophrenia GWAS SNPs ancestry-adjusted analysis (N=513)\***

| rsID       | chr | bp        | Ref Allele <sup>‡</sup> | SLE Cohort  |                |                    |          | SWG-PGC Cohort <sup>†</sup> |                |                  |          |
|------------|-----|-----------|-------------------------|-------------|----------------|--------------------|----------|-----------------------------|----------------|------------------|----------|
|            |     |           |                         | Frq (cases) | Frq (controls) | OR (95% CI)        | P-value  | Frq (cases)                 | Frq (controls) | OR (95% CI)      | P-value  |
| rs1498232  | 1   | 30433951  | T                       | 0.17        | 0.12           | 0.87 (0.66 - 1.16) | 3.50E-01 | 0.31                        | 0.30           | 1.07 (1.05-1.09) | 2.86E-09 |
| rs11210892 | 1   | 44100084  | A                       | 0.11        | 0.08           | 1.11 (0.84 - 1.46) | 4.81E-01 | 0.66                        | 0.68           | 0.93 (0.91-0.95) | 3.39E-10 |
| rs12129573 | 1   | 73768366  | A                       | 0.17        | 0.12           | 1.11 (0.84-1.47)   | 4.59E-01 | 0.38                        | 0.36           | 1.08 (1.06-1.10) | 2.03E-12 |
| rs1702294  | 1   | 98501984  | T                       | 0.19        | 0.12           | 0.84 (0.59-1.19)   | 3.36E-01 | 0.18                        | 0.19           | 0.89 (0.87-0.91) | 3.36E-19 |
| rs6670165  | 1   | 177280121 | T                       | 0.15        | 0.09           | 1.12 (0.80-1.56)   | 5.01E-01 | 0.20                        | 0.18           | 1.08 (1.05-1.10) | 4.45E-08 |
| rs7523273  | 1   | 207977083 | A                       | 0.14        | 0.08           | 0.96 (0.71-1.30)   | 7.86E-01 | 0.70                        | 0.69           | 1.06 (1.04-1.09) | 4.47E-08 |
| rs11682175 | 2   | 57987593  | T                       | 0.11        | 0.09           | 0.90 (0.68-1.20)   | 4.74E-01 | 0.52                        | 0.54           | 0.93 (0.91-0.95) | 1.47E-11 |
| rs2909457  | 2   | 162845855 | A                       | 0.25        | 0.16           | 0.94 (0.71-1.26)   | 6.83E-01 | 0.57                        | 0.59           | 0.94 (0.93-0.96) | 4.62E-08 |
| rs11693094 | 2   | 185601420 | T                       | 0.13        | 0.10           | 1.04 (0.79-1.38)   | 7.71E-01 | 0.44                        | 0.46           | 0.93 (0.91-0.95) | 1.53E-12 |
| rs59979824 | 2   | 193848340 | A                       | 0.16        | 0.10           | 0.82 (0.61-1.08)   | 1.60E-01 | 0.32                        | 0.34           | 0.94 (0.92-0.96) | 8.41E-09 |
| rs6434928  | 2   | 198304577 | A                       | 0.21        | 0.14           | 1.18 (0.90-1.54)   | 2.37E-01 | 0.64                        | 0.64           | 0.93 (0.91-0.95) | 2.06E-11 |
| rs6704641  | 2   | 200164252 | A                       | 0.18        | 0.13           | 0.97 (0.72-1.30)   | 8.20E-01 | 0.82                        | 0.81           | 1.08 (1.05-1.11) | 8.33E-09 |
| rs11685299 | 2   | 225391296 | A                       | 0.12        | 0.10           | 1.20 (0.89-1.62)   | 2.22E-01 | 0.31                        | 0.33           | 0.94 (0.92-0.96) | 1.12E-08 |
| rs6704768  | 2   | 233592501 | A                       | 0.32        | 0.19           | 0.94 (0.72-1.22)   | 6.28E-01 | 0.54                        | 0.55           | 0.93 (0.91-0.95) | 2.32E-12 |
| rs4330281  | 3   | 17859366  | T                       | 0.27        | 0.16           | 0.82 (0.61-1.10)   | 1.84E-01 | 0.48                        | 0.48           | 0.94 (0.92-0.96) | 4.64E-09 |
| rs75968099 | 3   | 36858583  | T                       | 0.24        | 0.18           | 1.07 (0.77-1.49)   | 6.83E-01 | 0.35                        | 0.32           | 1.09 (1.06-1.11) | 1.05E-13 |

|            |     |           |                         | SLE Cohort  |                |                  |          | SWG-PGC Cohort <sup>†</sup> |                |                   |          |
|------------|-----|-----------|-------------------------|-------------|----------------|------------------|----------|-----------------------------|----------------|-------------------|----------|
| rsID       | chr | bp        | Ref Allele <sup>‡</sup> | Frq (cases) | Frq (controls) | OR (95% CI)      | P-value  | Frq (cases)                 | Frq (controls) | OR (95% CI)       | P-value  |
| rs2535627  | 3   | 52845105  | T                       | 0.06        | 0.05           | 1.04 (0.81-1.35) | 7.55E-01 | 0.55                        | 0.53           | 1.07 (1.05-1.09)  | 4.26E-11 |
| rs832187   | 3   | 63833050  | T                       | 0.17        | 0.12           | 1.02 (0.79-1.32) | 8.63E-01 | 0.61                        | 0.62           | 0.94 (0.92-0.96)  | 1.43E-08 |
| rs7432375  | 3   | 136288405 | A                       | 0.18        | 0.14           | 1.09 (0.82-1.45) | 5.40E-01 | 0.42                        | 0.45           | 0.93 (0.91-0.95)  | 7.26E-11 |
| rs10520163 | 4   | 170626552 | T                       | 0.26        | 0.18           | 0.73 (0.55-0.96) | 2.60E-02 | 0.49                        | 0.47           | 1.07 (1.04-1.09)  | 1.47E-09 |
| rs1106568  | 4   | 176861301 | A                       | 0.27        | 0.18           | 1.37 (1.02-1.85) | 3.55E-02 | 0.75                        | 0.76           | 0.93 (0.91-0.96)  | 9.47E-09 |
| rs1501357  | 5   | 45364875  | T                       | 0.10        | 0.09           | 0.97 (0.73-1.27) | 8.00E-01 | 0.79                        | 0.80           | 0.93 (0.90-0.95)  | 5.05E-09 |
| rs4391122  | 5   | 60598543  | A                       | 0.21        | 0.14           | 1.03 (0.79-1.35) | 8.10E-01 | 0.51                        | 0.53           | 0.92 (0.90-0.94)  | 1.10E-14 |
| rs16867576 | 5   | 88746331  | A                       | 0.20        | 0.16           | 1.21 (0.83-1.77) | 3.23E-01 | 0.89                        | 0.88           | 1.10 (1.07-1.14)  | 4.61E-09 |
| rs4388249  | 5   | 109036066 | T                       | 0.32        | 0.20           | 0.99 (0.74-1.32) | 9.28E-01 | 0.21                        | 0.21           | 1.08 (1.05-1.10)  | 3.05E-08 |
| rs3849046  | 5   | 137851192 | T                       | 0.23        | 0.15           | 1.03 (0.79-1.34) | 8.29E-01 | 0.54                        | 0.52           | 1.06 (1.042-1.09) | 4.67E-09 |
| rs11740474 | 5   | 153680747 | A                       | 0.10        | 0.10           | 1.20 (0.88-1.62) | 2.48E-01 | 0.60                        | 0.62           | 0.94 (0.92-0.96)  | 3.15E-08 |
| rs1339227  | 6   | 73155701  | T                       | 0.07        | 0.06           | 0.85 (0.64-1.13) | 2.76E-01 | 0.35                        | 0.37           | 0.94 (0.92-0.96)  | 2.69E-08 |
| rs6466055  | 7   | 104929064 | A                       | 0.23        | 0.16           | 1.03 (0.78-1.36) | 8.48E-01 | 0.35                        | 0.33           | 1.07 (1.05-1.09)  | 1.13E-09 |
| rs211829   | 7   | 110048893 | T                       | 0.09        | 0.05           | 1.07 (0.79-1.43) | 6.74E-01 | 0.64                        | 0.63           | 1.06 (1.04-1.08)  | 3.71E-08 |
| rs13240464 | 7   | 110898915 | T                       | 0.31        | 0.20           | 1.12 (0.86-1.45) | 3.96E-01 | 0.67                        | 0.65           | 1.08 (1.06-1.11)  | 3.03E-13 |
| rs7801375  | 7   | 131567263 | A                       | 0.05        | 0.04           | 0.66 (0.45-0.94) | 2.21E-02 | 0.15                        | 0.15           | 0.92 (0.90-0.95)  | 4.42E-08 |

| rsID       | chr | bp        | Ref Allele <sup>‡</sup> | SLE Cohort  |                |                  |          | SWG-PGC Cohort <sup>†</sup> |                |                  |          |
|------------|-----|-----------|-------------------------|-------------|----------------|------------------|----------|-----------------------------|----------------|------------------|----------|
|            |     |           |                         | Frq (cases) | Frq (controls) | OR (95% CI)      | P-value  | Frq (cases)                 | Frq (controls) | OR (95% CI)      | P-value  |
| rs3735025  | 7   | 137074844 | T                       | 0.18        | 0.14           | 1.05 (0.79-1.40) | 7.24E-01 | 0.66                        | 0.64           | 1.07 (1.04-1.09) | 3.28E-09 |
| rs10503253 | 8   | 4180844   | A                       | 0.11        | 0.08           | 0.93 (0.70-1.24) | 6.14E-01 | 0.22                        | 0.22           | 1.07 (1.05-1.10) | 1.06E-08 |
| rs6984242  | 8   | 60700469  | A                       | 0.21        | 0.15           | 0.96 (0.74-1.23) | 7.31E-01 | 0.59                        | 0.60           | 0.94 (0.92-0.96) | 5.97E-09 |
| rs7819570  | 8   | 89588626  | T                       | 0.25        | 0.16           | 1.13 (0.79-1.62) | 5.06E-01 | 0.19                        | 0.17           | 1.08 (1.05-1.11) | 1.22E-08 |
| rs36068923 | 8   | 111485761 | A                       | 0.28        | 0.22           | 0.81 (0.59-1.12) | 1.97E-01 | 0.79                        | 0.80           | 0.92 (0.90-0.94) | 2.61E-11 |
| rs4129585  | 8   | 143312933 | A                       | 0.16        | 0.12           | 0.98 (0.72-1.33) | 8.77E-01 | 0.45                        | 0.42           | 1.09 (1.07-1.11) | 1.74E-15 |
| rs11139497 | 9   | 84739941  | A                       | 0.12        | 0.09           | 1.08 (0.81-1.45) | 6.05E-01 | 0.35                        | 0.34           | 1.07 (1.05-1.09) | 3.61E-09 |
| rs11191419 | 10  | 104612335 | A                       | 0.21        | 0.14           | 0.93 (0.72-1.22) | 6.18E-01 | 0.34                        | 0.36           | 0.91 (0.89-0.93) | 6.20E-19 |
| rs11027857 | 11  | 24403620  | A                       | 0.07        | 0.04           | 1.14 (0.88-1.47) | 3.33E-01 | 0.52                        | 0.50           | 1.06 (1.04-1.09) | 2.55E-09 |
| rs9420     | 11  | 57510294  | A                       | 0.13        | 0.08           | 0.87 (0.64-1.16) | 3.41E-01 | 0.33                        | 0.31           | 1.07 (1.05-1.09) | 2.24E-09 |
| rs12421382 | 11  | 109378071 | T                       | 0.13        | 0.08           | 0.68 (0.50-0.94) | 1.91E-02 | 0.32                        | 0.33           | 0.94 (0.92-0.96) | 3.70E-08 |
| rs2514218  | 11  | 113392994 | T                       | 0.31        | 0.22           | 0.97 (0.71-1.33) | 8.51E-01 | 0.31                        | 0.31           | 0.93 (0.91-0.95) | 2.75E-11 |
| rs77502336 | 11  | 123394636 | C                       | 0.25        | 0.14           | 0.75 (0.56-1.00) | 4.92E-02 | 0.34                        | 0.32           | 1.07 (1.04-1.09) | 7.54E-09 |
| rs55661361 | 11  | 124613957 | A                       | 0.29        | 0.20           | 0.67 (0.50-0.89) | 5.28E-03 | 0.32                        | 0.34           | 0.93 (0.91-0.95) | 2.80E-12 |
| rs10791097 | 11  | 130718630 | T                       | 0.14        | 0.09           | 0.94 (0.72-1.23) | 6.42E-01 | 0.48                        | 0.46           | 1.08 (1.06-1.10) | 1.09E-12 |
| rs75059851 | 11  | 133822569 | A                       | 0.20        | 0.14           | 0.63 (0.41-0.97) | 3.71E-02 | 0.81                        | 0.80           | 1.09 (1.06-1.12) | 3.87E-11 |

| rsID       | chr | bp        | Ref Allele <sup>‡</sup> | SLE Cohort  |                |                  |          | SWG-PGC Cohort <sup>†</sup> |                |                  |          |
|------------|-----|-----------|-------------------------|-------------|----------------|------------------|----------|-----------------------------|----------------|------------------|----------|
|            |     |           |                         | Frq (cases) | Frq (controls) | OR (95% CI)      | P-value  | Frq (cases)                 | Frq (controls) | OR (95% CI)      | P-value  |
| rs2007044  | 12  | 2344960   | A                       | 0.28        | 0.21           | 1.01 (0.77-1.32) | 9.57E-01 | 0.60                        | 0.62           | 0.91 (0.89-0.93) | 3.22E-18 |
| rs679087   | 12  | 29917265  | A                       | 0.29        | 0.20           | 0.98 (0.72-1.31) | 8.75E-01 | 0.32                        | 0.34           | 0.94 (0.92-0.96) | 3.91E-08 |
| rs4240748  | 12  | 92246786  | C                       | 0.12        | 0.11           | 0.99 (0.75-1.30) | 9.25E-01 | 0.36                        | 0.37           | 0.94 (0.92-0.96) | 4.59E-08 |
| rs10860964 | 12  | 103596455 | T                       | 0.06        | 0.05           | 1.14 (0.83-1.55) | 4.24E-01 | 0.65                        | 0.65           | 1.06 (1.04-1.08) | 4.84E-08 |
| rs2851447  | 12  | 123665113 | C                       | 0.26        | 0.16           | 1.02 (0.77-1.36) | 8.88E-01 | 0.72                        | 0.74           | 0.92 (0.89-0.94) | 1.86E-14 |
| rs2068012  | 14  | 30190316  | T                       | 0.13        | 0.08           | 1.18 (0.88-1.59) | 2.67E-01 | 0.76                        | 0.77           | 0.93 (0.91-0.96) | 1.41E-08 |
| rs2332700  | 14  | 72417326  | C                       | 0.17        | 0.11           | 0.86 (0.61-1.20) | 3.73E-01 | 0.26                        | 0.25           | 1.07 (1.05-1.10) | 4.86E-09 |
| rs2693698  | 14  | 99719219  | A                       | 0.24        | 0.18           | 1.08 (0.80-1.47) | 6.06E-01 | 0.41                        | 0.42           | 0.94 (0.92-0.96) | 4.80E-09 |
| rs12887734 | 14  | 104046834 | T                       | 0.24        | 0.15           | 0.91 (0.68-1.23) | 5.55E-01 | 0.30                        | 0.29           | 1.09 (1.06-1.11) | 1.36E-13 |
| rs12903146 | 15  | 61854663  | A                       | 0.30        | 0.19           | 0.91 (0.70-1.19) | 4.87E-01 | 0.54                        | 0.52           | 1.07 (1.05-1.09) | 3.38E-10 |
| rs12148337 | 15  | 70589272  | T                       | 0.28        | 0.21           | 1.01 (0.78-1.32) | 9.15E-01 | 0.48                        | 0.47           | 1.06 (1.04-1.08) | 1.79E-08 |
| rs8042374  | 15  | 78908032  | A                       | 0.06        | 0.05           | 0.94 (0.72-1.25) | 6.89E-01 | 0.75                        | 0.73           | 1.09 (1.07-1.12) | 2.44E-13 |
| rs950169   | 15  | 84706461  | T                       | 0.31        | 0.21           | 0.66 (0.45-0.94) | 2.48E-02 | 0.25                        | 0.26           | 0.92 (0.90-0.95) | 1.62E-11 |
| rs9922678  | 16  | 9946319   | A                       | 0.06        | 0.04           | 0.92 (0.68-1.25) | 5.97E-01 | 0.30                        | 0.28           | 1.07 (1.04-1.09) | 1.28E-08 |
| rs7405404  | 16  | 13749859  | T                       | 0.06        | 0.05           | 0.87 (0.63-1.19) | 3.88E-01 | 0.24                        | 0.22           | 1.08 (1.05-1.10) | 1.01E-09 |
| rs12691307 | 16  | 29939877  | A                       | 0.11        | 0.11           | 0.97 (0.75-1.27) | 8.37E-01 | 0.52                        | 0.51           | 1.07 (1.05-1.10) | 4.55E-11 |



|            |     |          |                         | SLE Cohort  |                |                  |          | SWG-PGC Cohort <sup>†</sup> |                |                  |          |
|------------|-----|----------|-------------------------|-------------|----------------|------------------|----------|-----------------------------|----------------|------------------|----------|
| rsID       | chr | bp       | Ref Allele <sup>‡</sup> | Frq (cases) | Frq (controls) | OR (95% CI)      | P-value  | Frq (cases)                 | Frq (controls) | OR (95% CI)      | P-value  |
| rs12325245 | 16  | 58681393 | A                       | 0.24        | 0.14           | 0.91 (0.65-1.28) | 5.98E-01 | 0.85                        | 0.86           | 0.92 (0.89-0.95) | 1.87E-08 |
| rs8044995  | 16  | 68189340 | A                       | 0.23        | 0.16           | 0.87 (0.63-1.19) | 3.84E-01 | 0.17                        | 0.16           | 1.08 (1.05-1.11) | 1.51E-08 |
| rs4523957  | 17  | 2208899  | T                       | 0.15        | 0.08           | 0.87 (0.65-1.15) | 3.15E-01 | 0.64                        | 0.63           | 1.07 (1.05-1.09) | 2.86E-10 |
| rs8082590  | 17  | 17958402 | A                       | 0.30        | 0.21           | 1.17 (0.85-1.59) | 3.30E-01 | 0.61                        | 0.61           | 0.94 (0.92-0.96) | 1.77E-08 |
| rs9636107  | 18  | 53200117 | A                       | 0.11        | 0.09           | 1.09 (0.82-1.45) | 5.36E-01 | 0.49                        | 0.50           | 0.93 (0.91-0.95) | 3.34E-12 |
| rs2905426  | 19  | 19478022 | T                       | 0.19        | 0.12           | 1.21 (0.92-1.58) | 1.72E-01 | 0.61                        | 0.63           | 0.93 (0.91-0.95) | 3.63E-10 |
| rs2053079  | 19  | 30987423 | A                       | 0.09        | 0.08           | 0.97 (0.70-1.36) | 8.77E-01 | 0.76                        | 0.77           | 0.93 (0.91-0.95) | 4.49E-09 |
| rs56873913 | 19  | 50091199 | T                       | 0.08        | 0.05           | 1.11 (0.83-1.49) | 4.79E-01 | 0.78                        | 0.77           | 1.07 (1.05-1.10) | 4.69E-08 |
| rs6065094  | 20  | 37453194 | A                       | 0.13        | 0.09           | 1.28 (0.98-1.67) | 6.68E-02 | 0.31                        | 0.32           | 0.93 (0.91-0.95) | 1.46E-11 |
| rs7267348  | 20  | 48131036 | T                       | 0.32        | 0.22           | 0.82 (0.61-1.09) | 1.75E-01 | 0.74                        | 0.75           | 0.94 (0.92-0.96) | 4.56E-08 |
| rs9607782  | 22  | 41587556 | A                       | 0.14        | 0.08           | 1.18 (0.86-1.64) | 3.02E-01 | 0.25                        | 0.23           | 1.09 (1.06-1.11) | 2.07E-11 |
| rs6002655  | 22  | 42603814 | T                       | 0.18        | 0.14           | 1.28 (0.98-1.68) | 7.57E-02 | 0.46                        | 0.44           | 1.07 (1.04-1.09) | 1.71E-09 |

\* Model adjusted for inferred ancestry categories (Admixed, African, East Asian, South Asian)

<sup>†</sup> Data obtained from the largest schizophrenia GWAS conducted to-date by the Schizophrenia Working Group of the Psychiatric Genomics Consortium(8).

<sup>‡</sup> The allele shown is the reference allele for the frequency and odds ratios columns. Note that this is not necessarily the risk allele.

Abbreviations: bp: base pair position; chr: chromosome; CI: confidence interval; cSLE: childhood-onset systemic lupus erythematosus; frq: frequency; GWAS: genome-wide association studies; ref: reference; OR: odds ratio

## References

1. Expanded Multi-Ethnic Genotyping Array [Internet]. Illumina; 2015 [cited 2020 Mar 3]. Available from: <https://www.illumina.com/content/dam/illumina-marketing/documents/products/datasheets/mega-ex-data-sheet-370-2015-004.pdf>
2. Global Screening Array-24 v3.0 BeadChip [Internet]. Illumina; 2020 [cited 2020 Jul 15]. Available from: <https://www.illumina.com/content/dam/illumina-marketing/documents/products/datasheets/infinium-global-screening-array-data-sheet-370-2016-016.pdf>
3. Mills RE, Walter K, Stewart C, Handsaker RE, Chen K, Alkan C, et al. Mapping copy number variation by population-scale genome sequencing. *Nature* 2011;470:59-65.
4. Rich SS, Akolkar B, Concannon P, Erlich H, Hilner JE, Julier C, et al. Overview of the Type I Diabetes Genetics Consortium. *Genes Immun* 2009;10 Suppl 1:S1-4.
5. Jia X, Han B, Onengut-Gumuscu S, Chen W-M, Concannon PJ, Rich SS, et al. Imputing amino acid polymorphisms in human leukocyte antigens. Tang J, editor. *PLoS ONE* 2013;8:e64683.
6. Jakobsson M, Scholz SW, Scheet P, Gibbs JR, VanLiere JM, Fung H-C, et al. Genotype, haplotype and copy-number variation in worldwide human populations. *Nature* 2008;451:998-1003.
7. Alexander DH, Novembre J, Lange K. Fast model-based estimation of ancestry in unrelated individuals. *Genome Res* 2009;19:1655-64.
8. Schizophrenia Working Group of the Psychiatric Genomics Consortium. Biological insights from 108 schizophrenia-associated genetic loci. *Nature* 2014;511:421-7.
9. Choi SW, Heng Mak TS, O'Reilly PF. A guide to performing polygenic risk score analyses [Internet]. *Genomics*; 2018 Sep. Available from: <http://biorxiv.org/lookup/doi/10.1101/416545>
